# Supplementary material
Source: publisher figshare collection journal article supplement (https://tandf.figshare.com/ndownloader/files/17584817)
Supplement: Supplementary file 1 [file 17584817]

**Appendix A: Proofs of Main Results**

***Proof of proposition 1***

Under SE strategy, we first solve the optimal product quantity decision of online retailer 1 according to backward induction. It is easy to verify that where . It indicates there exists a unique optimal solution. Let , we have . Then we solve the experience service level decision of the offline showroom. We can verify , which indicates there exists a unique optimal solution. Let , we have .

Through the same steps, we have and under SI strategy.

Comparing the expected profits of the offline showroom between SE and SI strategies, we have,

(A1)

From equation (A1), we havewhen and when .

***Proof of proposition 2***

Substituting equation (14) into (16), possible profits of the offline showroom ,, and are obtained under AI strategy, and we have,

(A2)

(A3)

From equation (A2), we have . It is obvious that when i.e., , or when and , ; when and , . Proof of proposition 2(1) is similar to that mentioned above.

***Proof of theorem 1***

We first solve the right side of equation (17), i.e. . It is easy to verify , which indicates there exists a unique optimal solution. Let , we have . Then we have equation (17) as. Solving the above inequality, we have when , profit of type offline showroom obtained by delivering true demand information equals to that obtained by mimicking behaviour. It indicates that online retailer regards offline base demand as type when . Thus the unique belief structure of online retailer in the separating equilibrium is,

(A4)

Where .

***Proof of theorem 2***

Under AE strategy, the offline showroom has no incentive to mimic another type. Then proof of proposition 2(1) is similar to that mentioned in proof of proposition 1.

Under AI strategy, we first solve the optimal experience service level without constraints. We can verify where . We know is concave in , which indicates there exists a unique optimal solution. Let , we have .

When and , type offline showroom has no incentive to mimic type offline showroom. We have,

(A5)

From equation (A5), we know the denominator of is bigger than 0; and the numerator of decreases in . When , ; when , if then , if then . Further, we have

Case 1: when , or when and , . It indicates that type offline showroom has no incentive to mimic type offline showroom, then the optimal experience service level is for ;

Case 2: when and , . It indicates that type offline showroom has the incentive to mimic type offline showroom;

Case 3: when , type offline showroom has the incentive to mimic type offline showroom.

Then we analyse the optimal experience service level in mimicking region. From equation (20), we have ; when , and when . Then we have the optimal experience service in mimicking region as and . Combining with the results in case 1, we have theorem 2.

***Proof of theorem 3***

It is easy to verify that and when , i.e. when . Then we only need to prove the relationship between and when . We have,

(A6)

Where , .

From equation (A6), we know , and

(A7)

Where , , .

We can verify , which indicates that equation (A7) increases in . When , ; when , , where . According to , we have when , ; when , . Then due to the nature of the quadratic equation, we have when or , ; otherwise, . Then we have theorem 3.

***Proof of proposition 3***

When , the offline showroom chooses the optimal channel cooperation strategy between AE and AIN strategies. Comparing the expected profits of the offline showroom between these strategies, we have,

(A8)

From equation (A8), we have when ; when .

When , the offline showroom chooses the optimal channel cooperation strategy between AE and AID strategies. First, it is easy to verify that when . Then we only need to analyse the optimal channel cooperation strategy choice between AE and AID strategies when , and we have,

(A9)

Where .

Form equation (A9), we know . If then ; if , we need to verify the sign of , which is similar to that mentioned in theorem 3.

***Proof of proposition 4***

When AIN strategy is the optimal channel cooperation strategy of the offline showroom, the impact of competition on the existing online retailer is easy to obtain. When AID strategy is the optimal channel cooperation strategy of the offline showroom, we have

(A10)

Where , .

It is easy to verify , then . The proof of the sign of is similar to that mentioned in theorem 3.

***Proof of proposition 5***

It is easy to get proposition 5 by letting profits of supply chain members under asymmetric information minus these under symmetric information.

**Appendix B: Intuitive criterion and elimination of the pooling equilibrium**

We use intuitive criterion (Cho and Kreps 1987) to refine multiple equilibriums in our model. Intuitive criterion eliminates the unreasonable equilibrium by eliminating the unbelievable posterior belief of a specific off-equilibrium strategy. In our model, the offline showroom has no incentive to mimic under AE strategy, so we focus on elimination of the pooling equilibrium under AI strategy.

In the pooling equilibrium, online retailer does not know the true base demand type of the offline showroom. Then online retailer makes a decision based on the prior probability of offline base demand. Let denote profit of type offline showroom in the pooling equilibrium, then

, (B1)

Let denote profit of type offline showroom when online retailer believes the offline showroom is type after observing experience service level in the separating equilibrium, then

, (B2)

Now, suppose that there exists a pooling equilibrium in which the offline showroom provides for each base demand type. Then we can always find which satisfies , and

(B3)

(B4)

Substituting and into and , we have

(B5)

(B6)

Where and .

From equations (B3)-(B6), we have

(B7)

(B8)

Due to and , we have

(B9)

Further, we have

(B10)

Based on the proof mentioned above, we will always find , where is small enough such that type offline showroom has the incentive to deviate from to , and type offline showroom has no incentive to deviate from , i.e.

(B11)

(B12)

Therefore the pooling equilibrium cannot survive the intuitive criterion.
